# Supplementary material
Source: HighWire-hosted journal article supplement (https://ebmtp.com/highwire/filestream/136534/field_highwire_adjunct_files/0/johannson_86_498.pdf)
Supplement: johannson_86_498.pdf [file johannson_86_498.pdf]

# 症状性颈动脉狭窄待血管重建的时期内卒中复发的研究

## 一项汇总分析

Elias Johansson, MD, PhD; Elisa Cuadrado-Godia, MD; Derek Hayden, MBBCh; Jakob Bjellerup, MD; Angel Ois, MD, PhD;  
Jaume Roquer, MD, PhD; Per Wester, MD; Peter J. Kelly, MD

**目的：**通过汇总近期多项较多应用现代卒中预防药物治疗的前瞻性研究的个体数据，对伴症状性颈动脉狭窄待血管重建 [ 颈动脉内膜切除术（carotid endarterectomy, CEA）或颈动脉支架置入术 ] 的患者发生同侧缺血性卒中的风险和预测因子进行量化。

**方法：**所纳入的数据来自于 2 项以医院为基础的前瞻性注册研究（于默奥、巴塞罗那）和 1 项人群为基础的前瞻性研究（都

柏林)。我们纳入了患症状性颈动脉狭窄在 50%~99% 范围内符合颈内血管重建术标准,并且在近期随访中出现同侧卒中或视网膜动脉阻塞(retinal artery occlusion,RAO)复发的患者。

**结果:** 607 例患症状性颈动脉狭窄在 50%~99% 范围内的患者中, 377 例符合预先设定的入选标准。血管重建前同侧缺血性卒中 /RAO 的复发风险为 2.7%(第 1 天)、5.3%(第 3 天)、11.5%(第 14 天)和 18.8%(第 90 天)。双变量分析显示,相比眼部事件,出现脑部事件与卒中复发风险上升相关(对数秩检验  $p = 0.04$ )。多变量 Cox 回归分析显示,复发风险与年龄较大相关 [校正后风险比(hazard ration,HR): 每 10 年增加 1.5,  $p = 0.02$ ], 脑部症状(卒中 / 短暂性脑缺血发作)相比眼部症状的相关性趋势更显著(校正后 HR: 2.7,  $p = 0.06$ ); 但与狭窄程度、吸烟状况、血管风险因素或药物治疗无关。

**结论:** 我们发现,在新近推荐进行 CEA 的 14 天时间内,同侧出血性卒中的复发风险较高。有必要开展进一步的随机试验,对出现症状后 14 天内采取紧急或亚急性颈内血管重建的获益性和安全性进行对比和确认。*Neurology*<sup>®</sup> 2016;86:498–504

(刘丽萍 审校)
